# Supplementary material
Source: PubMed Central journal article supplement (PMC7664837)
Supplement: mmc1.pdf [file mmc1.pdf]

Cell, Volume 183

## **Supplemental Information**

### **Antigen-Specific Adaptive Immunity to SARS-CoV-2 in Acute COVID-19 and Associations with Age and Disease Severity**

**Carolyn Rydyznski Moderbacher, Sydney I. Ramirez, Jennifer M. Dan, Alba Grifoni, Kathryn M. Hastie, Daniela Weiskopf, Simon Belanger, Robert K. Abbott, Christina Kim, Jinyong Choi, Yu Kato, Eleanor G. Crotty, Cheryl Kim, Stephen A. Rawlings, Jose Mateus, Long Ping Victor Tse, April Frazier, Ralph Baric, Bjoern Peters, Jason Greenbaum, Erica Ollmann Saphire, Davey M. Smith, Alessandro Sette, and Shane Crotty**

**Table S1. Participant characteristics, Related to Fig.1-7**

|                                                         | <b>Unexposed (n = 15)</b>       | <b>Convalescent COVID-19 (n = 15)</b> | <b>Acute COVID-19 (n = 24)</b>                                                            |
|---------------------------------------------------------|---------------------------------|---------------------------------------|-------------------------------------------------------------------------------------------|
| <b>Age (years)</b>                                      | 20-64 [Median = 26, IQR = 27.5] | 27-68 [Median = 44, IQR = 11.5]       | 25-86 [Median = 55.5, IQR = 33]                                                           |
| <b>Gender</b>                                           |                                 |                                       |                                                                                           |
| <b>Male (%)</b>                                         | 20% (3/15)                      | 47% (7/15)                            | 71% (17/24)                                                                               |
| <b>Female (%)</b>                                       | 80% (12/15)                     | 53% (8/15)                            | 29% (7/24)                                                                                |
| <b>Race</b>                                             |                                 |                                       |                                                                                           |
| <b>African American or Black (%)</b>                    | 0% (0/15)                       | N/A                                   | 13% (3/24)                                                                                |
| <b>Alaskan Native or American Indian (%)</b>            | 0% (0/15)                       | N/A                                   | 0% (0/24)                                                                                 |
| <b>Asian (%)</b>                                        | 13% (2/15)                      | N/A                                   | 4% (1/24)                                                                                 |
| <b>Native Hawaiian or Pacific Islander (%)</b>          | 7% (1/15)                       | N/A                                   | 0% (0/24)                                                                                 |
| <b>Other/Mixed Race (%)</b>                             | 7% (1/15)                       | N/A                                   | 46% (11/24)                                                                               |
| <b>Unknown (%)</b>                                      | 33% (5/15)                      | 100% (15/15)                          | 8% (2/24)                                                                                 |
| <b>White (%)</b>                                        | 40% (6/15)                      | N/A                                   | 29% (7/24)                                                                                |
| <b>Ethnicity</b>                                        |                                 |                                       |                                                                                           |
| <b>Hispanic (%)</b>                                     | 20% (3/15)                      | N/A                                   | 29% (7/24)                                                                                |
| <b>Non-Hispanic (%)</b>                                 | 60% (9/15)                      | N/A                                   | 58% (14/24)                                                                               |
| <b>Unknown (%)</b>                                      | 20% (3/15)                      | 100% (15/15)                          | 13% (3/24)                                                                                |
| <b>Hospitalization status</b>                           |                                 |                                       |                                                                                           |
| <b>Never hospitalized (%)</b>                           | 100% (15/15)                    | 100% (15/15)                          | 8% (2/24)                                                                                 |
| <b>Hospitalized at the time of blood collection (%)</b> | 0% (0/15)                       | 0% (0/15)                             | 92% (22/24)                                                                               |
| <b>Sample Collection Dates</b>                          | September 2018-October 2019     | March-May 2020                        | March-June 2020                                                                           |
| <b>SARS-CoV-2 PCR Positivity</b>                        | N/A                             | 100% (13/13); 13 tested               | 100% (23/23); 23 tested                                                                   |
| <b>Antibody Test Positivity</b>                         | N/A                             | 100% (15/15)                          | 75% (3/4); 4 tested                                                                       |
| <b>Peak Disease Severity</b>                            |                                 |                                       |                                                                                           |
| <b>Healthy/No disease (0)</b>                           | 100% (15/15)                    | 0% (0/15)                             | 0% (0/24)                                                                                 |
| <b>Mild (1-2)</b>                                       | N/A                             | 73% (11/15)                           | 8% (2/24)                                                                                 |
| <b>Moderate (3-5)</b>                                   | N/A                             | 27% (4/15)                            | 13% (3/24)                                                                                |
| <b>Severe (6-7)</b>                                     | N/A                             | 0% (0/15)                             | 33% (8/24)                                                                                |
| <b>Critical (8-9)</b>                                   | N/A                             | 0% (0/15)                             | 38% (9/24)                                                                                |
| <b>Fatal (10)</b>                                       | N/A                             | 0% (0/15)                             | 8% (2/24)                                                                                 |
| <b>Disease Severity at Time of Blood Collection</b>     |                                 |                                       | <b>*n=30 (4 donors with 2 time points, 1 donor with 3 time points)</b>                    |
| <b>Healthy/No disease (0)</b>                           | 100% (15/15)                    | 100% (15/15)                          | 0% (0/30)                                                                                 |
| <b>Mild (1-2)</b>                                       | N/A                             | 0% (0/15)                             | 7% (2/30)                                                                                 |
| <b>Moderate (3-5)</b>                                   | N/A                             | 0% (0/15)                             | 33% (10/30)                                                                               |
| <b>Severe (6-7)</b>                                     | N/A                             | 0% (0/15)                             | 37% (11/30)                                                                               |
| <b>Critical (8-9)</b>                                   | N/A                             | 0% (0/15)                             | 23% (7/30)                                                                                |
| <b>Fatal (10)</b>                                       | N/A                             | 0% (0/15)                             | 0% (0/30)                                                                                 |
| <b>Presenting Symptoms</b>                              |                                 |                                       |                                                                                           |
| <b>Cough (%)</b>                                        | N/A                             | 80% (12/15)                           | 67% (16/24)                                                                               |
| <b>Fatigue (%)</b>                                      | N/A                             | 73% (11/15)                           | 25% (6/24)                                                                                |
| <b>Fever (%)</b>                                        | N/A                             | 47% (7/15)                            | 54% (13/24)                                                                               |
| <b>Anosmia (%)</b>                                      | N/A                             | 40% (6/15)                            | 21% (5/24)                                                                                |
| <b>Dyspnea (%)</b>                                      | N/A                             | 47% (7/15)                            | 79% (19/24)                                                                               |
| <b>Diarrhea (%)</b>                                     | N/A                             | 13% (2/15)                            | 17% (4/24)                                                                                |
| <b>Days Post Symptom Onset at Collection</b>            | N/A                             | 25-56 [Median = 34, IQR = 16]         | 4-37 [Median = 11, IQR = 11.5]; *n=30 (4 donors with 2 time points, 1 with 3 time points) |
| <b>Past Medical History</b>                             |                                 |                                       |                                                                                           |
| <b>No known (%)</b>                                     | 100% (15/15)                    | 53% (8/15)                            | 13% (3/24)                                                                                |
| <b>Hyperlipidemia (%)</b>                               | N/A                             | 20% (3/15)                            | 8% (2/24)                                                                                 |
| <b>Hypertension (%)</b>                                 | N/A                             | 20% (3/15)                            | 29% (7/24)                                                                                |
| <b>Coronary artery disease (%)</b>                      | N/A                             | 7% (1/15)                             | 8% (2/24)                                                                                 |
| <b>Diabetes (%)</b>                                     | N/A                             | 7% (1/15)                             | 17% (4/24)                                                                                |
| <b>Obesity (%)</b>                                      | N/A                             | 7% (1/15)                             | 17% (4/24)                                                                                |
| <b>Other (%)</b>                                        | N/A                             | 40% (6/15)                            | 63% (15/24)                                                                               |
| <b>Known or suspected sick contact/exposure (%)</b>     | 0% (0/15)                       | 87% (13/15)                           | 67% (16/24)                                                                               |

**Table S2. COVID-19 disease severity classifications, Related to Fig. 4-7**

| Disease Severity Score (0-10) | Description                                                                                                                                                                                                                                                                                        | Hospitalization Requirement                                 | Supplemental Oxygen Needs for COVID-19                       |
|-------------------------------|----------------------------------------------------------------------------------------------------------------------------------------------------------------------------------------------------------------------------------------------------------------------------------------------------|-------------------------------------------------------------|--------------------------------------------------------------|
| <b>Healthy</b>                |                                                                                                                                                                                                                                                                                                    |                                                             |                                                              |
| <b>0</b>                      | No known COVID-19 diagnosis or convalescent (fully recovered from COVID-19 and 3 weeks or more from initial diagnosis, without symptoms)                                                                                                                                                           | No                                                          | None                                                         |
| <b>Mild</b>                   |                                                                                                                                                                                                                                                                                                    |                                                             |                                                              |
| <b>1</b>                      | Subclinical infection or asymptomatic (no symptoms preceding or up to time of COVID-19 diagnosis)                                                                                                                                                                                                  | No                                                          | None                                                         |
| <b>2</b>                      | Symptoms consistent with COVID-19 without limitation of activities                                                                                                                                                                                                                                 | No                                                          | None                                                         |
| <b>Moderate</b>               |                                                                                                                                                                                                                                                                                                    |                                                             |                                                              |
| <b>3</b>                      | Symptoms consistent with COVID-19 that limit activities and/or with home oxygen requirement (above baseline)                                                                                                                                                                                       | No                                                          | +/- home supplemental oxygen (above baseline)                |
| <b>4</b>                      | Hospitalized for a reason other than COVID-19 but incidentally found to be positive on testing or recovered from COVID-19 to the extent that hospital care is no longer required for COVID-19 but hospitalization extended for infection-control or other reasons unrelated to COVID-19 management | Yes, but not requiring (ongoing) hospital care for COVID-19 | None                                                         |
| <b>5</b>                      | Requiring ongoing medical care for COVID-19 other than supplemental oxygen (non-ICU level care)                                                                                                                                                                                                    | Yes (non-ICU)                                               | None                                                         |
| <b>Severe</b>                 |                                                                                                                                                                                                                                                                                                    |                                                             |                                                              |
| <b>6</b>                      | Requiring ongoing medical care for COVID-19 including supplemental oxygen via nasal cannula                                                                                                                                                                                                        | Yes (non-ICU)                                               | Nasal cannula                                                |
| <b>7</b>                      | Requiring ongoing medical care for COVID-19 including high-flow supplemental oxygen or non-invasive ventilation                                                                                                                                                                                    | Yes (non-ICU)                                               | High-flow oxygen delivery device or non-invasive ventilation |
| <b>Critical</b>               |                                                                                                                                                                                                                                                                                                    |                                                             |                                                              |
| <b>8</b>                      | Requiring vasopressor support or other ICU level care for COVID-19 but not mechanical ventilation or extracorporeal membrane oxygenation (ECMO)                                                                                                                                                    | Yes (ICU)                                                   | +/- but not requiring mechanical ventilation or ECMO         |
| <b>9</b>                      | Requiring ICU level care including mechanical ventilation or ECMO for management of COVID-19                                                                                                                                                                                                       | Yes (ICU)                                                   | Mechanical ventilation or ECMO                               |
| <b>Fatal</b>                  |                                                                                                                                                                                                                                                                                                    |                                                             |                                                              |
| <b>10</b>                     | Death attributable to COVID-19                                                                                                                                                                                                                                                                     | +/-                                                         | +/-                                                          |

**Table S3. Immune cell phenotyping panel, Related to Fig. 5-7**

| Marker-Fluorophore     | Clone    | Vendor        | Catalog #  |
|------------------------|----------|---------------|------------|
| Ki67-FITC              | B56      | BD            | 556026     |
| CD4-percp efluor710    | SK3      | Invitrogen    | 46-0047-42 |
| Gzm B- af647           | GB11     | Biolegend     | 515406     |
| IgM- af700             | MHM-88   | Biolegend     | 314538     |
| CD27-APCCy7            | O323     | Biolegend     | 302816     |
| IgD- PE                | IA6-2    | BD            | 555779     |
| CD56- PE Dazzle        | HCD56    | Biolegend     | 318348     |
| HLA-DR                 | Tu39     | BD            | 746979     |
| CD19 PE-Cy5            | H1B19    | Biolegend     | 302210     |
| CD38- PECy7            | HIT2     | Invitrogen    | 25-0389-42 |
| CXCR5-bv421            | J252D4   | Biolegend     | 356920     |
| CD14- bv510            | 63D3     | Biolegend     | 367123     |
| CD45RA- bv570          | HI100    | Biolegend     | 304132     |
| CXCR3- bv605           | G025H7   | Biolegend     | 353728     |
| CD20- bv650            | 2H7      | Biolegend     | 302336     |
| CCR7-bv711             | G043H7   | Biolegend     | 353228     |
| PD-1-bv786             | EH12.2H7 | Biolegend     | 329930     |
| CD3- buv395            | UCHT1    | BD            | 563546     |
| Fixable live/dead Blue | N/A      | Thermo Fisher | L34962     |
| CCR6-buv496            | 11A9     | BD            | 612948     |
| CD16-buv737            | 3G8      | BD            | 612786     |
| CD8- buv805            | SK1      | BD            | 612889     |

**Table S4. AIM Panel, Related to Fig. 2-7**

| Marker-Fluorophore     | Clone             | Vendor        | Catalog #                        |
|------------------------|-------------------|---------------|----------------------------------|
| CD69-FITC              | FN50              | Biologend     | 310904                           |
| CD4-percp efluor710    | SK3               | Invitrogen    | 46-0047-42                       |
| Ox40-APC               | Ber-Act35         | Biologend     | 350008                           |
| CD14/CD16/CD20-APCcy7  | 61D3/eBioCB16/2H7 | Invitrogen    | 47-0149-42/47-0168-42/47-0209-42 |
| PD-L1- PE              | 29E.2A3           | Biologend     | 329706                           |
| CD40L                  | 24-31             | Biologend     | 310840                           |
| CD38- PECy7            | HIT2              | Invitrogen    | 25-0389-42                       |
| CXCR5-bv421            | J252D4            | Biologend     | 356920                           |
| CD25-bv510             | BC96              | Biologend     | 302640                           |
| CD45RA- bv570          | HI100             | Biologend     | 304132                           |
| CXCR3- bv605           | G025H7            | Biologend     | 353728                           |
| CCR7-bv711             | G043H7            | Biologend     | 353228                           |
| PD-1-bv786             | EH12.2H7          | Biologend     | 329930                           |
| CD3- buv395            | UCHT1             | BD            | 563546                           |
| Fixable live/dead Blue | N/A               | Thermo Fisher | L34962                           |
| CCR6-buv496            | 11A9              | BD            | 612948                           |
| ICOS-buv563            | DX29              | BD            | 741421                           |

**Table S5. ICS panel, Related to Fig. 2,3,5,6,7**

| Marker-Fluorophore     | Clone             | Vendor        | Catalog #                        |
|------------------------|-------------------|---------------|----------------------------------|
| IL13-FITC              | 85BRD             | Invitrogen    | 11-7136-42                       |
| CD4-percp efluor710    | SK3               | Invitrogen    | 46-0047-42                       |
| GzmB-alexa-fluor 647   | GB11              | Biologend     | 515406                           |
| IL2- alexa-fluor 700   | MQ1-17H12         | Biologend     | 500320                           |
| CD14/CD16/CD20-APCcy7  | 61D3/eBioCB16/2H7 | Invitrogen    | 47-0149-42/47-0168-42/47-0209-42 |
| CD40L - PE             | 24-31             | Biologend     | 310806                           |
| IL10-PE-Dazzle         | JES3-19F1         | Biologend     | 506812                           |
| TNFa- PE-Cy7           | Mab11             | Invitrogen    | 25-7349-82                       |
| CXCR5-bv421            | J252D4            | Biologend     | 356920                           |
| CD45RA- bv570          | HI100             | Biologend     | 304132                           |
| CXCR3- bv605           | G025H7            | Biologend     | 353728                           |
| CCR7-bv711             | G043H7            | Biologend     | 353228                           |
| IL17a-bv786            | BL168             | Biologend     | 512338                           |
| CD3- buv395            | UCHT1             | BD            | 563546                           |
| Fixable live/dead Blue | N/A               | Thermo Fisher | L34962                           |
| IFNg- buv737           | 4S.D3             | BD            | 612845                           |
| CD8-buv805             | SK1               | BD            | 612889                           |
